# Supplementary material
Source: Springer Nature journal article supplement (https://www.springermedizin.de/resource/supplementary/12889_2012_4864_MOESM3_ESM.pdf/9490612)
Supplement: MOESM3 [file 9490612]

**Table 3:- Relationship between risk factors of Hygienic Practice among PLWHA on Home Based Care clients of Gondar town, 2009. (n= 294)**

| Characteristics                            |                                     | Hygienic Practice |      | Crude OR<br>(95% CI) | Adjusted OR<br>(95% CI) |
|--------------------------------------------|-------------------------------------|-------------------|------|----------------------|-------------------------|
|                                            |                                     | Poor              | Good |                      |                         |
|                                            |                                     |                   |      |                      |                         |
|                                            | Illiterate(can't<br>Read and write) | 64                | 65   | 1.0                  | 1.0                     |
| Educational<br>status                      | Read and write                      | 27                | 14   | 1.95(0.94, 4.07)     | 2.40(1.06, 5.41)*       |
|                                            | Elementary                          | 25                | 26   | 0.97(0.51, 1.86)     | 1.11(0.54, 2.28)        |
|                                            | Secondary                           | 28                | 30   | 0.94(0.51, 1.76)     | 1.11(0.55, 2.22)        |
|                                            | Above grade12                       | 8                 | 7    | 1.16(0.39, 3.38)     | 1.29(0.41, 4.06)        |
| Income quintile                            | Lowest(<br>poorest)                 | 26                | 27   | 1.14(0.51, 2.53)     | 1.39(0.57, 3.38)        |
|                                            | Second (poor)                       | 19                | 22   | 1.02(0.44, 2.39)     | 1.32(0.52, 3.33)        |
|                                            | Third (middle)                      | 54                | 46   | 1.39(0.69, 2.81)     | 1.64(0.76, 3.50)        |
|                                            | Fourth(High)                        | 32                | 22   | 1.73(0.78, 3.83)     | 2.39(0.99, 5.76)        |
|                                            | Fifth (Highest)                     | 21                | 25   | 1.0                  | 1.0                     |
| Hand washing<br>device<br>availability     | Yes                                 | 1                 | 11   | 1.0                  | 1.0                     |
|                                            | No                                  | 151               | 131  | 12.67(1.61, 99.52)*  | 8.76 (1.00, 76.72)*     |
|                                            | Every day                           | 8                 | 7    | 1                    | 1                       |
| How frequently<br>do you wash<br>your body | Twice a week                        | 45                | 44   | 0.89(0.29, 2.67)     | 1.31(0.38, 4.54)        |
|                                            | Once a week                         | 79                | 78   | 0.88(0.30, 2.56)     | 1.03(0.31, 3.40)        |
|                                            | once in a month                     | 16                | 10   | 1.40(0.38, 5.06)     | 1.62(0.36, 7.14)        |
|                                            | more than a<br>month                | 4                 | 3    | 1.16(0.19, 7.11)     | 12.80(0.81, 20.88)      |
| the reason that                            | Economical                          | 104               | 63   | 0.12(.02, 0.54)*     | 0.04(0.00, 0.43)*       |

|                                       |        |     |     |                   |                  |
|---------------------------------------|--------|-----|-----|-------------------|------------------|
| soap not affordable                   | others | 8   | 4   | 1.0               | 1.0              |
| the presence of towel in the HW place | Yes    | 6   | 15  | 1.0               | 1.0              |
|                                       | No     | 146 | 127 | 2.87(1.08, 7.62)* | 2.26(0.72, 7.09) |
| Attending hygiene education           | Yes    | 73  | 72  | 0.89(0.56, 1.42)  | 1.23(0.73, 2.07) |
|                                       | No     | 79  | 70  | 1.0               | 1.0              |
| do you need help with walking         | yes    | 3   | 9   | 0.29(0.07, 1.12)  | 0.23(0.04, 1.14) |
|                                       | No     | 149 | 133 | 1.0               | 1.0              |
| diarrhea for the past 24 hour         | Yes    | 15  | 8   | 1.83(0.75, 4.46)  | 1.62(0.61, 4.26) |
|                                       | No     | 137 | 134 | 1.0               | 1.0              |

---

\* Statistically significant association P<0.05
